# Supplementary material for: Exosomes Derived from Squamous Head and Neck Cancer Promote Cell Survival after Ionizing Radiation
Source: PLoS One. 2016 Mar 23;11(3):e0152213. doi: 10.1371/journal.pone.0152213 (PMC4805173; doi:10.1371/journal.pone.0152213)
Supplement: S1 Table — A short tandem repeat profile was obtained by PCR amplification of eight core short tandem repeat loci plus amelogenin for sex determination. Authentication of cells was performed by comparing the results with the online DMSZ Profile Database (www.dmsz.de). In the diagram the best fitting five cell lines of this alignment with the database are depicted. The authentication for BHY matches to 100%. (XLS) [file pone.0152213.s002.xls]

## Sheet: S1 Table
Tested Loci	AKW0016107 Tested BHY	Query
		BHY	NB(TU)1-10	JHCA-ov	182-PF SK	GAK
AMEL 1	X	X	X	X	X	X
AMEL 2	Y	Y	X	X	Y	X
05_D13S317 1	12	12	12	8	10	9
05_D13S317 2	13	13	12	8	10	13
07_D16S539 1	12	12	9	12	12	12
07_D16S539 2	12	12	12	12	12	12
CSF1PO 1	10	10	10	10	10	10
CSF1PO 2	10	10	12	12	10	10
TH01 1	9	9	9	9	9	9
TH01 2	9	9	9	9	9	9
vWA 1	15	15	14	14	15	15
vWA 2	16	16	14	18	16	18
D7S820 1	11	11	12	11	11	11
D7S820 2	12	12	12	11	12	11
D5S818 1	10	10	10	10	9	10
D5S818 2	10	10	10	10	13	10
TPOX 1	8	8	11	11	11	8
TPOX 2	11	11	11	11	11	9
