# Supplementary material for: Exosomes Derived from Squamous Head and Neck Cancer Promote Cell Survival after Ionizing Radiation
Source: PLoS One. 2016 Mar 23;11(3):e0152213. doi: 10.1371/journal.pone.0152213 (PMC4805173; doi:10.1371/journal.pone.0152213)
Supplement: S2 Table — A short tandem repeat profile was obtained by PCR amplification of eight core short tandem repeat loci plus amelogenin for sex determination. Authentication of cells was performed by comparing the results with the online DMSZ Profile Database (www.dmsz.de). In the diagram the best fitting five cell lines of this alignment with the database are depicted. For the tested FaDu cells the best fitting database profile was obtained from FaDu cells with a 88.3% match. (XLS) [file pone.0152213.s003.xls]

## Sheet: S2 Table
Tested Loci	AKW0016108 Tested FaDu	Query
		FaDu	NCI-H2228	NCI-BL1514	JURL-MK1	NEC14
AMEL 1			X	X	X	X
AMEL 2			X	X	Y	Y
05_D13S317 1	8	9	11	8	11	11
05_D13S317 2	9	9	11	9	11	11
07_D16S539 1	11	11	11	11	11	9
07_D16S539 2	11	12	13	13	12	11
CSF1PO 1	12	12	12	10	12	12
CSF1PO 2	12	12	12	12	12	12
TH01 1	8	8	7	8	8	8
TH01 2	8	8	8	8	8	8
vWA 1	15	15	15	17	18	14
vWA 2	17	17	17	17	18	17
vWA 3	18	18		18
D7S820 1	11	11	11	9	10	10
D7S820 2	12	12	11	11	13	12
D5S818 1	12	12	12	11	12	12
D5S818 2	12	12	12	12	12	13
TPOX 1	11	11	11	11	8	11
TPOX 2	11	11	11	11	11	11
