# Supplementary material for: Exosomes Derived from Squamous Head and Neck Cancer Promote Cell Survival after Ionizing Radiation
Source: PLoS One. 2016 Mar 23;11(3):e0152213. doi: 10.1371/journal.pone.0152213 (PMC4805173; doi:10.1371/journal.pone.0152213)
Supplement: S3 Table — Data were plotted on a semi-log scale and fitted to the linear quadratic equation SF = e(-αD-βD^2). Parameters α and β were used to calculate the α/ β ratio, the inactivation dose for 37% survival (D37) and the surviving fraction at a dose of 2 Gy (SF2). (XLS) [file pone.0152213.s004.xls]

## Sheet: S3 Table
Treatment	α	β	R2	D37	SF2	α/β
Control	0.0623	0.0316	0.9934	4.7	77.8	1.97152
0 Gy EXO	0.031	0.0346	0.9917	4.9	81.8	0.895954
3 Gy EXO	0.0177	0.0314	0.983	5.4	85.1	0.563694
6 Gy EXO	0.0074	0.0267	0.984	6	88.6	0.277154
9 Gy EXO	0.025	0.0261	0.994	5.7	85.7	0.957854
R^2: correlation coefficient for the linear-quadratic equation
